# Supplementary material for: Sero‐ and Feco‐Prevalence of Helicobacter pylori Infection and Its Associated Risk Factors among Adult Dyspeptic Patients Visiting the Outpatient Department of Adet Primary Hospital, Yilmana Densa District, Northwest Ethiopia
Source: Hindawi journal article supplement (doi:10.1155/2023/2305681), 2023-01-01
Supplement: f1 [file 2305681.f1.pdf]

| Socio-demographic and- economic variables | Total subjects examined | Positive for serology test | Positive for stool antigen test | Positive for either Ab or Ag test |
|-------------------------------------------|-------------------------|----------------------------|---------------------------------|-----------------------------------|
|                                           |                         | n (%: 95% CI)              | n (%:95% CI)                    | n(%:95% CI)                       |
| <b>Gender</b>                             |                         |                            |                                 |                                   |
| Male                                      | 210                     | 145 (69: 62.3-75.2)        | 123 (58.6: 51.6-65.3)           | 152 (72.4:65.8-78.3)              |
| Female                                    | 193                     | 105 (54.4:47.1-61.6)       | 83 (43:35.9-50.3)               | 109 (56.5:49.2-63.6)              |
| Total                                     | 403                     | 250 (62: 57.1-66.8)        | 206 (51.1: 46.1-56.1)           | 261(64.8:59.9-69.4)               |
| <b>Age (year)</b>                         |                         |                            |                                 |                                   |
| 18-29                                     | 90                      | 51 (56.7:45.8-67.1)        | 42 (46.7:36.1-57.5)             | 52 (57.8:46.9-68.1)               |
| 30-39                                     | 138                     | 90 (65.2:56.6-73.1)        | 74 (53.6:44.9-62.1)             | 94 (68.1:59.6-75.8)               |
| 40-49                                     | 95                      | 57 (60:49.4-69.9)          | 47 (49.5:39-59.9)               | 60 (63.2:52.6-72.8)               |
| Above 50                                  | 80                      | 52 (65:53.5-75.3)          | 43 (53.8:42.2-65.0)             | 55 (68.8:57.4-78.7)               |
| Total                                     | 403                     | 250(62: 57.1-66.8)         | 206 (51.1: 46.1-56.1)           | 261(64.8:59.9-69.4)               |
| <b>Residences</b>                         |                         |                            |                                 |                                   |

|       |     |                     |                      |                      |
|-------|-----|---------------------|----------------------|----------------------|
| Rural | 264 | 206 (78:72.5-82.9)  | 175 (66.3:60.2-72.0) | 217 (82.2:77.0-86.6) |
| Urban | 139 | 44 (31.7:24.0-40.1) | 31 (22.3:15.7-30.1)  | 44 (31.7:24.0-40.1)  |
| Total | 403 | 250(62: 57.1-66.8)  | 206(51.1: 46.1-56.1) | 261(64.8:59.9-69.4)  |

**Educational**

**status**

|                      |     |                     |                      |                     |
|----------------------|-----|---------------------|----------------------|---------------------|
| Illiterate           | 250 | 162(64.8:58.5-70.7) | 133(53.2:46.8-59.5)  | 169(67.6:61.4-73.4) |
| Primary(1-8)         | 96  | 57(59.4:48.9-69.3)  | 51(53.1:42.7-63.4)   | 59(61.5:51.0-71.2)  |
| Secondary(9-12)      | 42  | 25(59.5:43.3-74.4)  | 16(38.1:23.6-54.4)   | 25(59.5:43.3-74.4)  |
| Diploma and<br>above | 15  | 6(40:16.3-67.7)     | 6(40:16.3-67.7)      | 8(53.3:26.6-78.7)   |
| Total                | 403 | 250(62: 57.1-66.8)  | 206(51.1: 46.1-56.1) | 261(64.8:59.9-69.4) |

**Marital status**

|          |     |                     |                     |                     |
|----------|-----|---------------------|---------------------|---------------------|
| Married  | 229 | 145(63.3:56.7-69.6) | 122(53.3:46.6-59.9) | 153(66.8:60.3-72.9) |
| Widowed  | 48  | 30(62.5:47.4-76.0)  | 23(47.9:33.3-62.8)  | 30(62.5:47.4-76.0)  |
| Divorced | 58  | 36(62.1:48.4-74.5)  | 32(55.2:41.5-68.3)  | 38(65.5:51.9-77.5)  |
| Single   | 68  | 39(57.4:44.8-69.3)  | 29(42.6:30.7-55.2)  | 40(58.8:46.2-70.6)  |

|       |     |                    |                      |                     |
|-------|-----|--------------------|----------------------|---------------------|
| Total | 403 | 250(62: 57.1-66.8) | 206(51.1: 46.1-56.1) | 261(64.8:59.9-69.4) |
|-------|-----|--------------------|----------------------|---------------------|

**Occupational**

**status**

|        |     |                     |                     |                     |
|--------|-----|---------------------|---------------------|---------------------|
| Farmer | 214 | 140(65.4:58.6-71.8) | 120(56.1:49.1-62.8) | 145(67.8:61.0-74.0) |
|--------|-----|---------------------|---------------------|---------------------|

|               |    |                    |                    |                    |
|---------------|----|--------------------|--------------------|--------------------|
| Daily laborer | 67 | 39(58.2:45.5-70.2) | 28(41.8:29.8-54.5) | 41(61.2:48.5-72.9) |
|---------------|----|--------------------|--------------------|--------------------|

|          |    |                    |                    |                    |
|----------|----|--------------------|--------------------|--------------------|
| Merchant | 33 | 19(57.6:39.2-74.5) | 17(51.5:33.5-69.2) | 20(60.6:42.1-77.1) |
|----------|----|--------------------|--------------------|--------------------|

|         |    |                   |                 |                    |
|---------|----|-------------------|-----------------|--------------------|
| Student | 16 | 9(56.3:29.9-80.2) | 8(50:24.7-75.3) | 10(62.5:35.4-84.8) |
|---------|----|-------------------|-----------------|--------------------|

|            |    |                    |                   |                    |
|------------|----|--------------------|-------------------|--------------------|
| House wife | 21 | 14(66.7:43.0-85.4) | 8(38.1:18.1-61.6) | 14(66.7:43.0-85.4) |
|------------|----|--------------------|-------------------|--------------------|

|            |    |                    |                    |                    |
|------------|----|--------------------|--------------------|--------------------|
| Government | 52 | 29(55.8:41.3-69.5) | 25(48.1:34.0-62.4) | 31(59.6:45.1-73.0) |
|------------|----|--------------------|--------------------|--------------------|

employee

|       |     |                    |                      |                     |
|-------|-----|--------------------|----------------------|---------------------|
| Total | 403 | 250(62: 57.1-66.8) | 206(51.1: 46.1-56.1) | 261(64.8:59.9-69.4) |
|-------|-----|--------------------|----------------------|---------------------|

**Family size**

|    |    |                    |                    |                    |
|----|----|--------------------|--------------------|--------------------|
| ≤3 | 87 | 54(62.1:51.0-72.2) | 45(51.7:40.7-62.6) | 55(63.2:52.2-73.3) |
|----|----|--------------------|--------------------|--------------------|

|     |     |                   |                   |                   |
|-----|-----|-------------------|-------------------|-------------------|
| 4-5 | 200 | 120(60:52.9-66.8) | 102(51:43.9-58.1) | 128(64:56.9-70.6) |
|-----|-----|-------------------|-------------------|-------------------|

|    |     |                    |                    |                    |
|----|-----|--------------------|--------------------|--------------------|
| >5 | 116 | 76(65.5:56.1-74.1) | 59(50.9:41.4-60.3) | 78(67.2:57.9-75.7) |
|----|-----|--------------------|--------------------|--------------------|

|       |     |                    |                      |                     |
|-------|-----|--------------------|----------------------|---------------------|
| Total | 403 | 250(62: 57.1-66.8) | 206(51.1: 46.1-56.1) | 261(64.8:59.9-69.4) |
|-------|-----|--------------------|----------------------|---------------------|

**Monthly income****(ETB)**

|            |     |                     |                      |                     |
|------------|-----|---------------------|----------------------|---------------------|
| Below 1000 | 88  | 60(68.2:57.4-77.7)  | 53(60.2:49.2-70.5)   | 63(71.6:61.0-80.7)  |
| 1000-2500  | 232 | 142(61.2:54.6-67.5) | 117(50.4:43.8-57.0)  | 147(63.4:56.8-69.6) |
| Above 2500 | 83  | 48(57.8:46.5-68.6)  | 36(43.4:32.5-54.7)   | 51(61.4:50.1-71.9)  |
| Total      | 403 | 250(62: 57.1-66.8)  | 206(51.1: 46.1-56.1) | 261(64.8:59.9-69.4) |

---

Supplementary information for Table 3 in the manuscript

Table S1. Confidence intervals (95% CI) for sero- and feco-prevalence estimates of *H. pylori* infection across socio-demographic and -economic characteristics of study participants in Yilmana Densa District, northwest Ethiopia, (n=403).
